# Supplementary figures and images for: A Molecular-Level Landscape of Diet-Gut Microbiome Interactions: Toward Dietary Interventions Targeting Bacterial Genes
Source: PubMed Central journal article supplement — mBio. 2015 Oct 27;6(6):e01263-15. doi: 10.1128/mBio.01263-15 (PMC4626853; doi:10.1128/mbio.01263-15), 2015-10-27

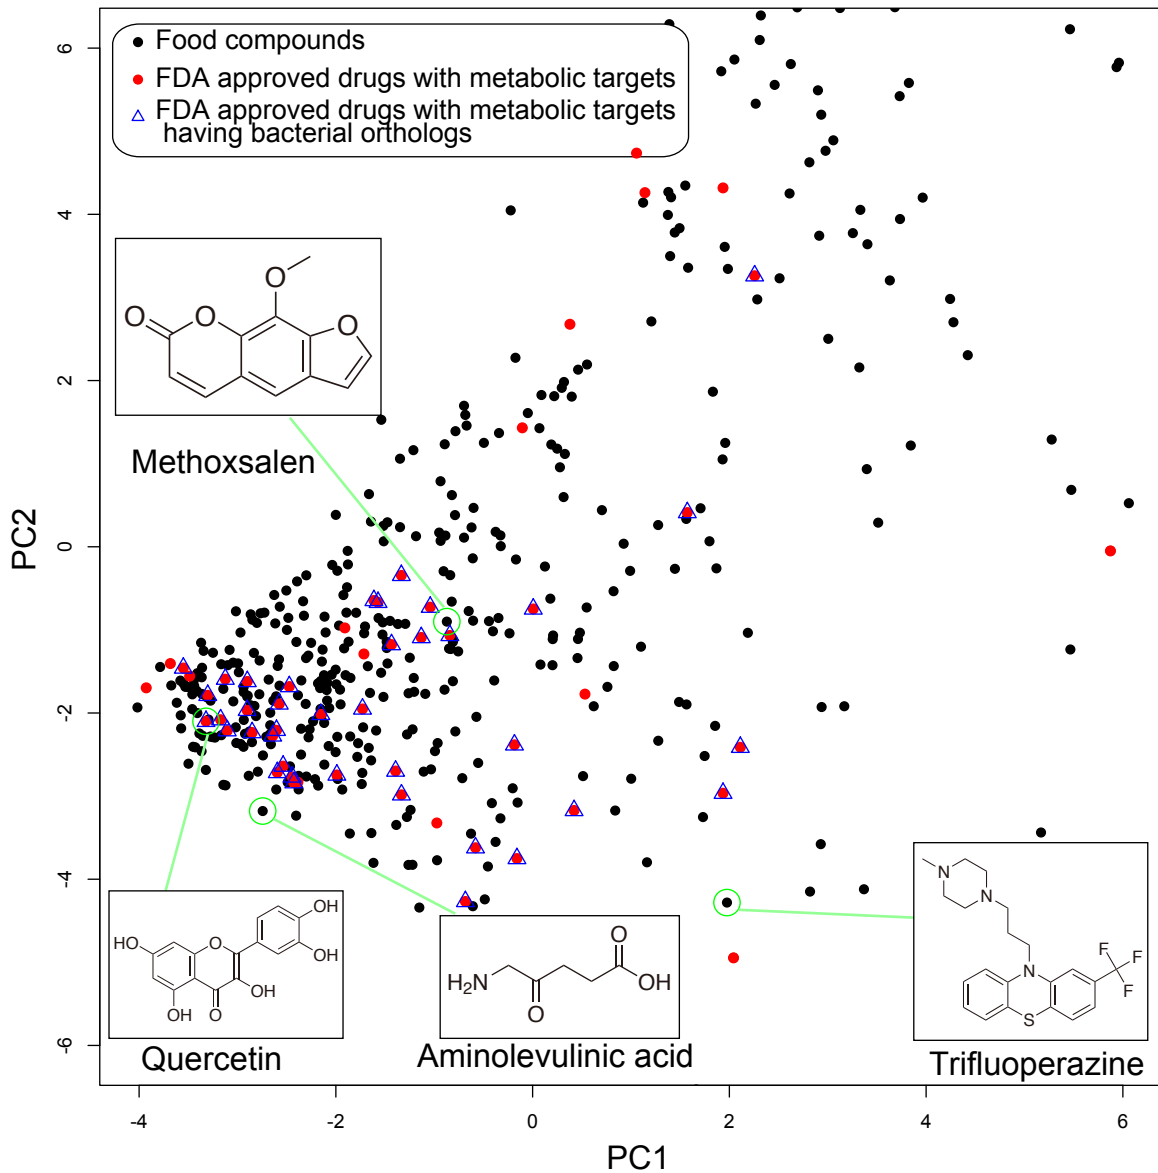

Supplement: mbo005152517sf2.pdf [file mbo005152517sf2.pdf]

**A**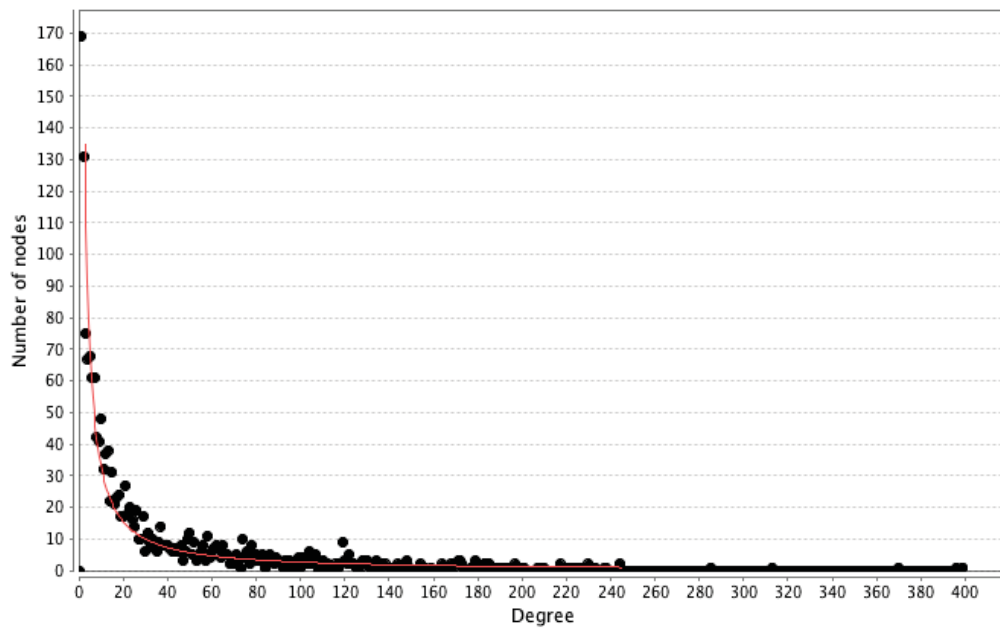**B**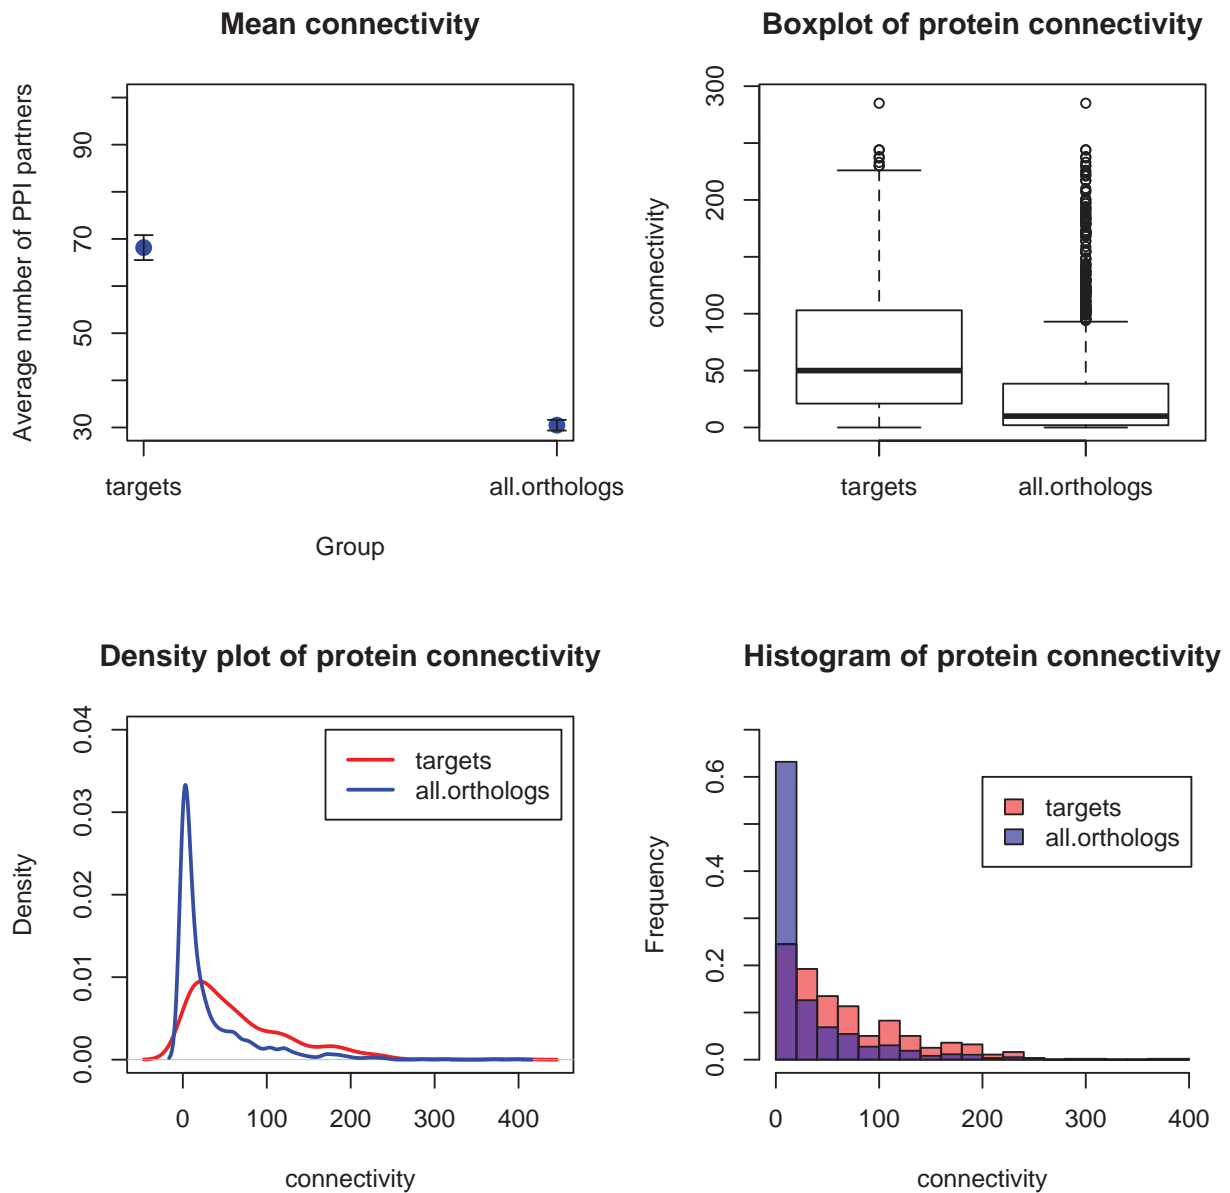

Supplement: mbo005152517sf3.pdf [file mbo005152517sf3.pdf]

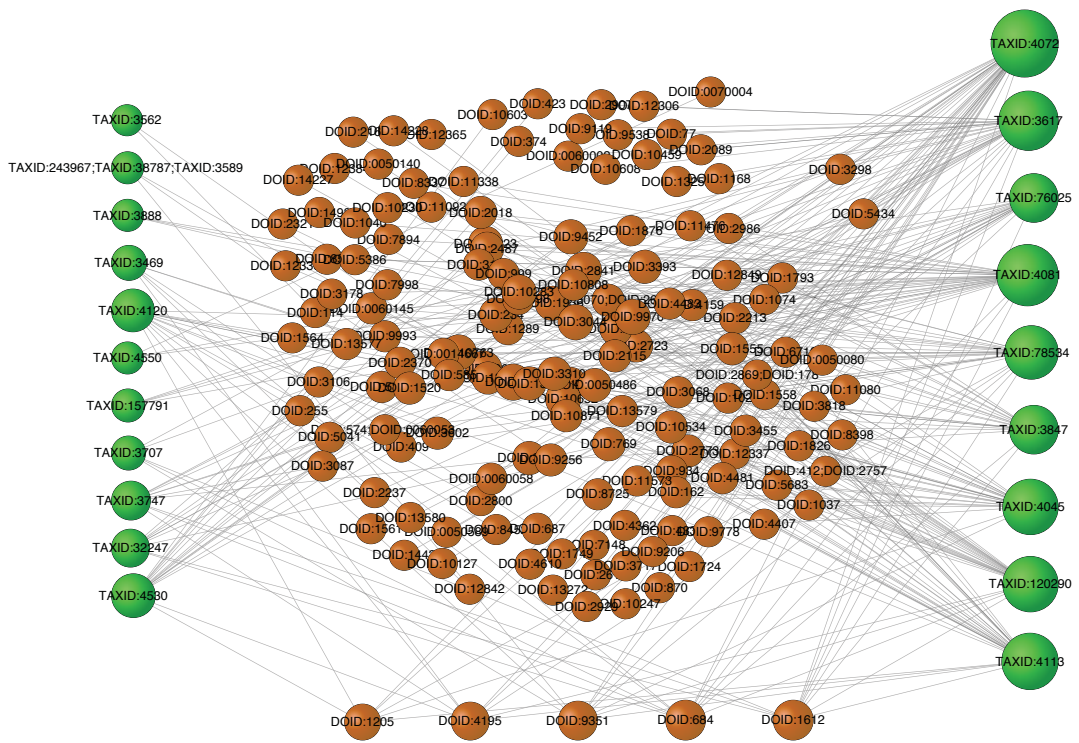

Supplement: mbo005152517sf5.pdf [file mbo005152517sf5.pdf]
